# Supplementary material for: The cost evaluation of day-case compared to inpatient cochlear implantation in adults: subanalysis of a randomized controlled trial
Source: Springer Nature journal article supplement (doi:10.1007/s00405-024-08501-7), 2024-03-26
Supplement: MOESM1 [file 26895220]

## Costs diary

This costs diary regards **week / month** \* \_\_\_\_\_ of the year \_\_\_\_\_

Date: \_\_\_\_ / \_\_\_\_ / \_\_\_\_\_

Unique participation number: \_\_\_\_\_

Treatment group: **day-case surgery / inpatient surgery** \*

\* Delete as applicable

**Question 1 and 2 will be filled in once, only at intake:**

### 1. What is your highest completed educational training?

- 0 No school or training completed
- 0 Primary school
- 0 Preparatory vocational education / lower vocational education
- 0 Intermediate secondary education
- 0 Intermediate vocational education
- 0 Higher vocational education / pre-university education
- 0 University of Professional Education (UPE)
- 0 College
- 0 Other:

### 2. What do you do in everyday life?

- 0 I am in school/college
- 0 I work in paid employment
- 0 I am self-employed
- 0 I am housewife, -husband
- 0 I am unemployed
- 0 I am unfit for work
- 0 I am retired
- 0 Other:

**Part A. Questions regarding work**

**3. Do you have a paid employment?**

0 No. *Proceed to question 13.*

0 Yes, ik heb betaald werk. *Proceed to question 4.*

**4. What is your profession?**

**5. How many hours a week do you work?**

*Only count the hours you are being paid for.*

 hours

**6. On how many days a week do you work?**

 days

**7. Were your absent at work in the past 4 weeks due to illness?**

0 No

0 Yes, I have been absent for \_\_\_\_\_ *workdays*

**8. Were you absent at work longer that the duration of 4 weeks due to illness?**

*This concerns a continuous period of absence.*

0 No

0 Yes

**9. What date did you call in sick?**

 Date: \_\_\_ / \_\_\_ / \_\_\_

**10. Were there days in the past 4 weeks on which you did attend work, but during which you suffered from psychiatric or physical problems during work?**

- 0 No
- 0 Yes

**11. On how many workdays did you suffer from psychiatric or physical problems during work?**

Only count the workdays in the past 4 weeks

 workdays

**12. On the days that you suffered from these problems, it is possible that you performed your work less effective than usual. Can you give an indication of this on the scale below?**

*Look at the numbers below. Number 10 indicates that on these days you were able to perform work as effective as usual. Number 0 indicates that you could not perform your work at all on these days. Encircle the applicable number.*

I could not perform work on these days

I could perform approximately half of work

I could perform work as effective as usual

0      1      2      3      4      5      6      7      8      9      10

**Also in unpaid work (for example: voluntary work, the housework, work in the garden, doing groceries) it is possible to suffer from psychiatric or physical problems**

**13. Were there days in the past 4 weeks on which you could perform less unpaid work due to suffering from psychiatric or physical problems?**

- 0 No
- 0 Yes

**14. On how many days was this the case?**

 days

**15. Suppose that someone, for example your partner, relative or an acquaintance, would have helped you on these days. And would have performed the unpaid work that you were not able to do for you. How many hours would that person have been busy with this on average on these days?**

|             |
|-------------|
| _____ hours |
|-------------|

**Part B. Questions regarding care**

**16. What medication have you used in the past 4 weeks?**

- 0 No medication
- 0 Medicine 1: name: \_\_\_\_\_
- 0 Medicine 2: name: \_\_\_\_\_
- 0 Medicine 3: name: \_\_\_\_\_
- 0 Medicine 4: name: \_\_\_\_\_
- 0 Medicine 5: name: \_\_\_\_\_
- 0 Medicine 6: name: \_\_\_\_\_
- 0 Medicine 7: name: \_\_\_\_\_
- 0 Medicine 8: name: \_\_\_\_\_

**17. How many appointments have you had with your family doctor in the past 4 weeks?**

- 0 No appointments
- 0 \_\_\_\_\_ appointments *during daytime on workdays*
- 0 \_\_\_\_\_ appointments *on workdays outside working hours or in the weekend*

**18. Did you have an appointment at the outpatient clinic of the hospital in the past 4 weeks?**

*This concerns appointments with a doctor for yourself. For example: cardiologist, rheumatologist, ENT specialist, neurologist.*

0 No

0 Yes

**19. Which doctors have you visited in the past 4 weeks? And how often?**

Doctor: \_\_\_\_\_ Number of times: \_\_\_\_\_

For example: *Cardiologist* \_\_\_\_\_ 2 times

1 \_\_\_\_\_ times

2 \_\_\_\_\_ times

3 \_\_\_\_\_ times

4 \_\_\_\_\_ times

5 \_\_\_\_\_ times

6 \_\_\_\_\_ times

**20. Did you have an appointment with one or more of the caregivers mentioned below in the past 4 weeks? If so, how often?**

Caregiver: \_\_\_\_\_ Number of times: \_\_\_\_\_

0 Physiotherapist \_\_\_\_\_ times

0 Occupational therapist \_\_\_\_\_ times

0 Speech therapist \_\_\_\_\_ times

0 Dietician \_\_\_\_\_ times

0 Social worker \_\_\_\_\_ times

0 Company doctor \_\_\_\_\_ times

0 Audiologist \_\_\_\_\_ times

0 Psychologist / psychotherapist \_\_\_\_\_ times

0 Other, \_\_\_\_\_ times

**21. How many times have you visited the Emergency Room (ER) in the hospital in the past 4 weeks?**

- 0 I have not visited the ER.
- 0 I have visited the ER \_\_\_\_\_ times.

**22. Have you been admitted to the hospital in the past period?**

*During a hospital admission you sleep over in the hospital, for example if you are not allowed to leave the hospital after an operation.*

*A day-case admission is an admission whereby you do not sleep over in the hospital, for example with chemotherapy treatment, dialysis or blood transfusions. This also includes a day of rehabilitation in a rehabilitation centre.*

*If you were admitted more than once for either hospital or day-case admission, sum up the total number of days.*

0 No

0 Yes, for hospital admission

 days

0 Yes, for day-case admission

 days

**23. Have you made costs this week for required extra help?**

0 No

0 Yes: 0 Childcare, approximately € \_\_\_\_\_

0 Household, approximately € \_\_\_\_\_

0 Overig, namelijk:

0 (reason) \_\_\_\_\_, approximately € \_\_\_\_\_

0 (reason) \_\_\_\_\_, approximately € \_\_\_\_\_

0 (reason) \_\_\_\_\_, approximately € \_\_\_\_\_

*Thank you for completing this questionnaire!*

*You will receive notification when your next questionnaire is available.*
